# Supplementary material for: Identification of long non-coding RNAs BAT5, MALAT1, and UBOX5 in the peripheral blood leukocytes of women with endometriosis before surgery and at 1 month after surgery
Source: Research Square preprint supplement (doi:10.21203/rs.3.rs-8011405/v1), 2025-11-14
Supplement: Supplementary file 1 [file 0a00e48600276f4462ac863a.docx]

**Table 2**. The comparison of the pre- and postoperative clinical and biochemical parameters of patients with endometriosis

| **Variable** | **Preoperative (n=28)**  **Mean ± SD** | **Postoperative 1th month**  **(n=20)**  **Mean ± SD** | ***p***  **value** |
| --- | --- | --- | --- |
| BMI (kg/m2) | 24.83 ± 5.09 | 25.12 ± 4.49 | 0.415 |
| CA 125 (U/mL) | 61.38 ± 49.99 | 24.87 ± 15.35 | **0.002*** |
| CA 19-9 (U/mL) | 23.60 ± 26.24 | 14.61 ± 7.71 | 0.286* |
| Dyspareunia VRS Score, n (%)  Absent  1  2  3 | 17 (60.7)  3 (10.7)  4 (14.3)  4 (14.3) | 20 (100)  0  0  0 | **0.017** |
| Dysmenorrhea VRS Score, n (%)  Absent  1  2  3  4 | 4 (14.3)  2 (7.1)  5 (17.9)  12 (42.9)  5 (17.9) | 20 (100)  0  0  0  0 | **0.0001** |
| Non-cyclic pelvic pain VRS Score, n (%)  Absent  1  2  3  4 | 10 (35.7)  5 (17.9)  7 (25.0)  5 (17.9)  1 (3.6) | 14 (70.0)  4 (20.0)  2 (10.0)  0  0 | 0.076 |

***Abbreviations****:* SD, standard deviation; BMI, BMI body mass index; CA 125, cancer antigen 125; VRS, verbal rating scale

*p* values ​​were obtained by X2 test, Student t-test and *Mann-Whitney U test.

Bold values denote statistical significance at the p < 0.05 level.
