# Supplementary material for: Identification of long non-coding RNAs BAT5, MALAT1, and UBOX5 in the peripheral blood leukocytes of women with endometriosis before surgery and at 1 month after surgery
Source: Research Square preprint supplement (doi:10.21203/rs.3.rs-8011405/v1), 2025-11-14
Supplement: Supplementary file 2 [file 153a2e7154bd8236a66af8a1.docx]

**Table 1.** Clinical and biochemical characteristics of the study and control groups

| **Variable** | **Endometriosis (n=28)**  **Mean ± SD** | **Control**  **(n=27)**  **Mean ± SD** | ***p***  **value** |
| --- | --- | --- | --- |
| **Preoperative assessment** | | | | |
| Age (years) | 37.68 ± 8.04 | 39.44 ± 6.68 | 0.500* |
| Parity, n (%)  Nulliparity  Multiparity | 12 (42.9) | 10 (37.0) | 0.660 |
| 16 (57.1) | 17 (63.0) |
| Dyspareunia VRS Score, n (%)  No  1  2  3 | 17 (60.7)  3 (10.7)  4 (14.3)  4 (14.3) | 22 (81.5)  4 (14.8)  1 (3.7)  0 | 0.087 |
| Dysmenorrhea VRS Score, n (%)  No  1  2  3  4 | 4 (14.3)  2 (7.1)  5 (17.9)  12 (42.9)  5 (17.9) | 21 (77.8)  1 (3.7)  3 (11.1)  2 (7.4)  0 | **0.0001** |
| Non-cyclic pelvic pain VRS Score, n (%)  No  1  2  3  4  5 | 10 (35.7)  5 (17.9)  7 (25.0)  5 (17.9)  1 (3.6)  0 | 24 (88.9)  0  2 (7.4)  0  0  1 (3.7) | **0.0001** |
| Current smoking, yes n (%) | 8 (28.6) | 10 (37.0) | 0.504 |
| Infertility, yes n (%) | 7 (25.0) | 11 (40.7) | 0.214 |
| BMI (kg/m2) | 24.82 ± 5.09 | 25.06 ± 4.12 | 0.849 |
| CA 125 (U/mL) | 61.37 ± 49.99 | 20.65 ± 15.78 | **0.0001*** |
| CA 19-9 (U/mL) | 23.60 ± 26.24 | 16.98 ± 11.79 | 0.381* |
| Hb (g/dL) | 11.81 ± 1.35 | 12.17 ± 1.88 | 0.421 |
| Htc (%) | 36.24 ± 3.23 | 36.99 ± 4.61 | 0.465 |
| WBC (x103/ ul) | 6.70 ± 2.56 | 6.93 ± 1.95 | 0.709 |
| Thrombocyte (x103/ ul) | 278.07 ± 62.31 | 271.78 ± 50.19 | 0.681 |
| Fasting blood glucose (mg/dL) | 86.14 ± 17.51 | 88.26 ± 7.69 | 0.906* |
| HbA1c (%) | 5.48 ± 0.30 | 5.37 ± 0.36 | 0.255 |
| Erythrocyte Sedimentation Rate | 15.96 ± 11.43 | 12.22 ± 9.76 | 0.161* |
| CRP (mg/L) | 0.60 ± 1.01 | 0.22 ± 0.17 | 0.101* |
| **Intraoperative assessment** | | | | |
| Endometrioma diameter (cm) | 6.18 ± 2.89 | - | - |
| Presence of bilaterality of endometrioma, n (%)  Absent  Present | 23 (82.1)  5 (17.9) | - | - |
| Presence of peritoneal  endometriosis lesions, n (%)  Yes  No | 15 (53.6)  13 (46.4) | - | - |
| r ASRM stage, n (%)  I-II  III-IV | 1 (3.6)  27 (96.4) | - | - |
| DIE status, n (%)  Absent  Present | 17 (60.7)  11 (39.3) | - | - |

***Abbreviations****:* SD, standard deviation; BMI, BMI body mass index; CA 125, cancer antigen 125; Hb, hemoglobin; Hct, hematocrit; WBC, white blood cell; CRP, C-reactive protein; VRS, verbal rating scale; r ASRM, revised American Society for Reproductive Medicine; DE, deep endometriosis

*p* values ​​were obtained by X2 test, Student t-test and *Mann-Whitney U test.

Bold values denote statistical significance at the p < 0.05 level.
