# Supplementary material for: Identification of long non-coding RNAs BAT5, MALAT1, and UBOX5 in the peripheral blood leukocytes of women with endometriosis before surgery and at 1 month after surgery
Source: Research Square preprint supplement (doi:10.21203/rs.3.rs-8011405/v1), 2025-11-14
Supplement: Supplementary file 3 [file 52e6562296fc56b6149aeb20.docx]

**Table 3.** The expression levels of long non-coding RNAs *BAT5, MALAT1*, and *UBOX5* in circulating leukocytes among the study groups

| ***lncRNAs*** | **Endometriosis Group**  **Preoperative (n=28)**  **mean ± SD** | **Endometriosis Group**  **Postoperative**  **(n=20)**  **mean ± SD** | **Control Group**  **(n=27)** | ***p* value**  **Control vs Preoperative** | ***p* value**  **Control vs Postoperative** | ***p* value**  **Preoperative vs Postoperative** |
| --- | --- | --- | --- | --- | --- | --- |
| ***BAT5 expression levels*** | 9.26 ± 16.02 | 4.46 ± 10.17 | 3.06 ± 4.28 | 0.103 | 0.239 | 0.414 |
| ***MALAT1 expression levels*** | 44.33 ± 83.15 | 16.77 ± 34.17 | 10.30 ± 19.76 | **0.005** | 0.244 | **0.048** |
| ***UBOX5 expression levels*** | 13.92 ± 17.44 | 28.17 ± 67.31 | 15.09 ± 36.29 | **0.029** | 0.112 | 0.594 |

***Abbreviations****:* SD, standard deviation; lncRNAs, long non-coding RNAs

Mann-Whitney U Test was performed for the associations of lncRNA expression levels between two groups.

Bold values denote statistical significance at the p < 0.05 level
