# Supplementary material for: Identification of long non-coding RNAs BAT5, MALAT1, and UBOX5 in the peripheral blood leukocytes of women with endometriosis before surgery and at 1 month after surgery
Source: Research Square preprint supplement (doi:10.21203/rs.3.rs-8011405/v1), 2025-11-14
Supplement: Supplementary file 4 [file 76c6ee9e2bc0a48e78c6a2d6.docx]

**Table 4.** Receiver operating characteristic (ROC) analysis for serum CA-125and the expression levels oflncRNAs *MALAT1* and *UBOX5* between women with endometriosis and the controls

|  | **AUC** | **95% Cl** | **p value** | **Cut-off** | **Sensitivity, %** | **Specificity, %** |
| --- | --- | --- | --- | --- | --- | --- |
| **CA-125** | 0.84 | 0.73-0.95 | 0.0001 | 23.27 | 80.8 | 75.0 |
| ***MALAT1*** | 0.70 | 0.56-0.85 | 0.006 | 5.83 | 62.5 | 71.0 |
| ***UBOX5*** | 0.66 | 0.50-0.82 | 0.047 | 4.37 | 54.2 | 91.0 |

Abbreviations: AUC, area under the receiver operating characteristic curve; CI, confidence interval
